# Supplementary material
Source: publisher figshare collection journal article supplement (https://asha.figshare.com/ndownloader/files/42278700)
Supplement: Supplementary file 1 [file 42278700]

# **Supplemental Material S1.** Example of a session for a participant in the START group.

Each of the six target words is repeated a total of 45 times in a session, with 15 of those repetitions in response to a loud, startling acoustic stimulus (SAS). Each word is presented in a block of 15 trials. The remaining words are repeated in response to quiet, non-startling cues (n). Each trial consists of a GET READY and GO sound, with the latter being either an SAS or an n cue for participants in the START group. Participants in the Control group receive the same paradigm of GET READY and GO sounds, but only ever receive non-startling cues.

|        | Trial |     |     |     |     |     |     |     |     |     |     |     |     |     |     |
|--------|-------|-----|-----|-----|-----|-----|-----|-----|-----|-----|-----|-----|-----|-----|-----|
| Block  | 1     | 2   | 3   | 4   | 5   | 6   | 7   | 8   | 9   | 10  | 11  | 12  | 13  | 14  | 15  |
| cheese | n     | SAS | n   | SAS | SAS | n   | SAS | n   | n   | n   | n   | SAS | n   | n   | n   |
| feet   | n     | n   | n   | SAS | n   | SAS |
| stop   | n     | SAS | n   | n   | SAS | SAS | n   | n   | SAS | n   | n   | SAS | n   | n   | n   |
| water  | SAS   | n   | n   | SAS | n   | n   | SAS | SAS | n   | SAS | n   | n   | n   | n   | n   |
| stop   | SAS   | n   | n   | n   | SAS | n   | n   | n   | n   | SAS | n   | n   | SAS | n   | SAS |
| ball   | n     | n   | n   | n   | n   | SAS | n   | n   | SAS | n   | SAS | n   | n   | n   | n   |
| cheese | n     | n   | n   | SAS | n   | n   | n   | n   | SAS | n   | SAS | n   | n   | SAS | n   |
| water  | n     | SAS | n   | n   | SAS | n   | n   | n   | n   | n   | n   | SAS | SAS | n   | n   |
| please | SAS   | n   | n   | SAS | n   | n   | n   | n   | n   | n   | n   | n   | n   | SAS | n   |
| stop   | n     | SAS | n   | SAS | n   | SAS | n   | n   | SAS | n   | SAS | n   | n   | n   | n   |
| cheese | SAS   | n   | n   | n   | n   | n   | n   | n   | n   | n   | n   | n   | n   | n   | n   |
| ball   | n     | n   | n   | SAS | n   | n   | n   | SAS | n   | n   | n   | SAS | n   | n   | n   |
| please | n     | n   | n   | n   | n   | SAS | SAS | n   | n   | n   | n   | n   | n   | n   | n   |
| feet   | SAS   | n   | n   | n   | n   | n   | n   | SAS | n   | n   | n   | SAS | n   | n   | n   |
| ball   | n     | n   | SAS | n   | n   | n   | SAS | n   | SAS | n   | SAS | SAS | n   | n   | n   |
| feet   | n     | n   | n   | n   | n   | SAS | n   | SAS | n   | SAS | n   | n   | SAS | n   | SAS |
| please | n     | n   | SAS | n   | n   | n   | n   | n   | n   | SAS | SAS | n   | n   | SAS | SAS |
| water  | SAS   | n   | n   | SAS | SAS | n   | n   | n   | SAS | n   | n   | SAS | n   | n   | n   |
